# Supplementary material for: Dynamics and morphology of solid electrolyte interphase (SEI)
Source: Royal Society of Chemistry journal article supplement (doi:10.1039/c6cp02816k), 2016-01-01
Supplement: c6cp02816k1.pdf [file c6cp02816k1.pdf]

Cite this: DOI: 10.1039/xxxxxxxxxx

## Electronic Supplementary Information: Dynamics and Morphology of Solid Electrolyte Interphase (SEI)<sup>†</sup>

Fabian Single,<sup>a,b,‡</sup> Birger Horstmann,<sup>\*a,b,‡</sup> and Arnulf Latz<sup>a,b,c</sup>

Received Date  
Accepted Date

DOI: 10.1039/xxxxxxxxxx

www.rsc.org/journalname

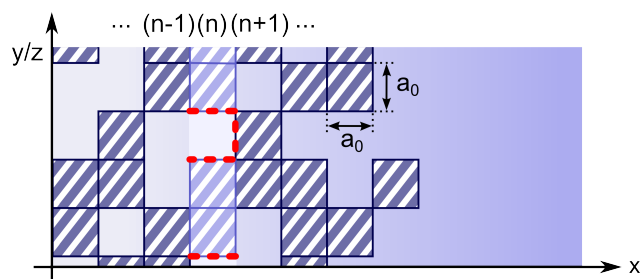

**Fig. 1** Scheme for the derivation of eq (9). SEI is assumed to be constructed from cubes with volume  $a_0^3$ . The surface area for growth in slice ( $n$ ) (dashed) is marked red and depends on the occupation probabilities of slice ( $n$ ) as well as on occupation probability of the neighbouring slices ( $n-1$ ) and ( $n+1$ ).

### Specific Surface Area

We derive an expression for the local specific surface area from the assumption that SEI consists of cubes with edge length  $a_0$ , as shown in Figure 1. All cubes in one slice ( $n$ ) are occupied with the same probability, the local SEI volume fraction  $\varepsilon_{\text{SEI}}^{(n)} = 1 - \varepsilon^{(n)}$ . In this way, the surface area in slice ( $n$ ) also depends on the porosity of the neighbouring slices. This is approximated with the second derivative of  $\varepsilon$

$$A_i = \frac{6}{a_0} \varepsilon \left( \tilde{\varepsilon} + \frac{a_0^2}{6} \frac{\partial^2 \tilde{\varepsilon}}{\partial x^2} \right),$$

where  $\tilde{\varepsilon}$  is the volume fraction of SEI compounds whose surfaces can facilitate SEI formation. We assume that SEI forms only on

similar species as well as initial SEI, i.e.  $\tilde{\varepsilon} = \varepsilon_i + \varepsilon_{\text{init}}$ . The initial SEI profile is needed to start the simulation, providing a nucleation seed.

### Boundary Conditions and Initialization

We initialize the system in equilibrium at  $t = 0$ . Thus, solvent concentration and electric potential equal the reference and equilibrium values  $c_{\text{EC}}^0$  and  $\Phi_{\text{EC}}^0$  in the whole simulation domain. Both SEI volume fractions and the convective velocity are zero initially. A smooth initial profile  $\varepsilon_{\text{init}}$  serves as nucleation seed for SEI growth (see Figure 2(a)). Its thickness of 2 nm is interpreted as the electron tunneling depth through several SEI compounds<sup>1</sup>. Note that  $\varepsilon_{\text{init}}$  is zero for  $x > 2$  nm. The electrode potential  $\Phi(0, t)$  is determined by the state of charge (SOC) dependent potential of graphite electrodes<sup>2</sup>. We perform an initial charge at the rate  $C/20$  from  $\Phi_{\text{EC}}^0$  to  $\Phi_{\text{final}}$  corresponding to a linear ramp of SOC. Then SOC and potential  $\Phi(0, t)$  on the left boundary are kept constant. The boundary conditions  $j_E(x_{\text{max}}) = 0$ ,  $j_{D,i}(0) = v(0) = 0$  prevent electrons from leaving the simulation domain and solvent molecules from flowing into the electrode.

### Parameters

If not stated elsewhere, parameters used in figures and the results discussed are listed in Table 1. We use the partial molar volumes  $\bar{V}_i^E$  of the pure solvents<sup>3</sup>.  $\Gamma$  was calculated from  $\bar{V}_{\text{Li}_2\text{EDC}}$  by assuming a cubic primitive cell. Initial concentrations  $c_{\text{EC}}^0$  are chosen to represent a 3:7 mixture by volume. Equilibrium potentials are chosen to be 0.8 V<sup>4</sup> for EC and 0.3 V for DMC. This value is used because inorganic species are found below this voltage<sup>5</sup>. It is also close to the value of 0.25 V at which Zhang et al. found a transition in SEI properties<sup>6</sup>. The diffusion coefficient is chosen in the same order of magnitude as self-diffusion coefficients measured by Hayamizu et al.<sup>7</sup>.

### Methods

The system of equations (2)-(5) is solved in MATLAB using the implicit ODE15i function. All equations are discretized with the

\* Corresponding Author: birger.horstmann@dlr.de

<sup>a</sup> German Aerospace Center (DLR), Institute of Engineering Thermodynamics, Pfaffenwaldring 38-40, 70569 Stuttgart, Germany

<sup>b</sup> Helmholtz Institute Ulm (HIU), Helmholtzstraße 11, 89081 Ulm, Germany

<sup>c</sup> Ulm University, Institute of Electrochemistry, Albert-Einstein-Allee 47, 89069 Ulm, Germany

<sup>†</sup> Main file available: [Enter DOI].

<sup>‡</sup>These authors contributed equally to this work<sup>\*</sup>

**Table 1** List of simulation parameters, all potentials relative to the Li/Li<sup>+</sup> reduction pair.

| Parameter                                    | Description                           | Value            | Unit                              |
|----------------------------------------------|---------------------------------------|------------------|-----------------------------------|
| $\Phi_{\text{EC}}^0$                         | EC reduction potential                | 0.8              | V <sup>8</sup>                    |
| $\Phi_{\text{DMC}}^0$                        | DMC reduction potential               | 0.3              | V <sup>8</sup>                    |
| $\Phi_{\text{final}}$                        | electrode potential during simulation | 0.1              | V                                 |
| $\bar{V}_{\text{EC}}^{\text{E}}$             | EC molar volume                       | 66.7             | cm <sup>3</sup> /mol <sup>3</sup> |
| $\bar{V}_{\text{DMC}}^{\text{E}}$            | DMC molar volume                      | 84.2             | cm <sup>3</sup> /mol <sup>3</sup> |
| $\bar{V}_{\text{Li}_2\text{EDC}}^{\text{S}}$ | Li <sub>2</sub> EDC molar volume      | 56.8             | cm <sup>3</sup> /mol <sup>9</sup> |
| $\bar{V}_{\text{LiMC}}$                      | LiMC molar volume                     | 60.0             | cm <sup>3</sup> /mol <sup>9</sup> |
| $D_{\text{EC}}^0$                            | EC diffusion coefficient              | 10 <sup>-6</sup> | cm <sup>2</sup> /s <sup>7</sup>   |
| $c_{\text{EC}}^0$                            | EC concentration in bulk electrolyte  | 4.5              | mol/l                             |
| $a_0$                                        | pore-size and size of SEI particles   | 1.0              | nm                                |
| $\Gamma$                                     | surface site density                  | 4.0              | μmol/m <sup>2</sup> <sup>9</sup>  |
| $E_{\text{A}}$                               | transition state energy               | 1.0              | eV <sup>10,11</sup>               |

finite volume method. If  $\kappa$  vanishes ( $\epsilon_{\text{SEI}} = 0$ ), eq (5) cannot be used to solve for the potential. For this reason, we add a small regularization parameter  $\Delta\kappa = 0.05 \cdot \kappa^0$  to the effective conductivity in eq (6), mimicking electron jumps into the electrolyte. The spatial resolution used in our simulations is 0.5 Å which realizes the continuum limit.

## References

- 1 Y. X. Lin, Z. Liu, K. Leung, L. Q. Chen, P. Lu and Y. Qi, *Journal of Power Sources*, 2016, **309**, 221–230.
- 2 M. Safari and C. Delacourt, *Journal of The Electrochemical Society*, 2011, **158**, 562–571.
- 3 R. Naejus and D. Lemordant, *The Journal of Chemical Thermodynamics*, 1997, **29**, 1503–1515.
- 4 K. Edström, M. Herstedt and D. P. Abraham, *Journal of Power Sources*, 2006, **153**, 380–384.
- 5 P. Lu, C. Li, E. W. Schneider and S. J. Harris, *Journal of Physical Chemistry C*, 2014, **118**, 896–903.
- 6 S. Zhang, M. S. Ding, K. Xu, J. Allen and T. R. Jow, *Electrochemical and Solid-State Letters*, 2001, **4**, A206.
- 7 K. Hayamizu, *Journal of Chemical and Engineering Data*, 2012, **57**, 2012–2017.
- 8 S. J. Harris and P. Lu, *Journal of Physical Chemistry C*, 2013, **117**, 6481–6492.
- 9 O. Borodin, G. D. Smith and P. Fan, *Journal of Physical Chemistry B*, 2006, **110**, 22773–22779.
- 10 Y. Yamada, Y. Iriyama, T. Abe and Z. Ogumi, *Langmuir*, 2009, **25**, 12766–12770.
- 11 K. Xu, A. Von Cresce and U. Lee, *Langmuir*, 2010, **26**, 11538–11543.
